# Supplementary material for: Dogs and Cats: Reservoirs for Highly Diverse Campylobacter jejuni and a Potential Source of Human Exposure
Source: Animals (Basel). 2020 May 12;10(5):838. doi: 10.3390/ani10050838 (PMC7278488; doi:10.3390/ani10050838)
Supplement: Supplementary file 1 [file animals-10-00838-s001.xlsx]

## Sheet: Feuil1
Table S1: Genetic characteristics of C. jejuni isolates collected from pets in France
Isolate ID	Sample ID	Animal	CGF40-100% cluster	CGF40-90% cluster
CTA007	TA001	dog	259	63
CTA011	TA007	cat	115	38
CTA022	TA019	dog	599	157
CTA023	TA019	dog	591	154
CTA025	TA019	dog	598	157
CTA026	TA019	dog	592	154
CTA028	TA019	dog	593	154
CTA029	TA019	dog	590	154
CTA031	TA019	dog	600	157
CTA035	TA034	cat	286	70
CTA037	TA034	cat	285	69
CTA040	TA034	cat	284	69
CTA043	TA037	dog	701	182
CTA047	TA037	dog	594	155
CTA053	TA041	dog	648	168
CTA057	TA041	dog	643	168
CTA061	TA041	dog	649	168
CTA115	TA041	dog	693	177
CTA119	TA041	dog	645	168
CTA063	TA042	dog	234	60
CTA075	TA044	dog	234	60
CTA082	TA046	dog	255	63
CTA093	TA048	dog	374	89
CTA101	TA048	dog	234	60
CTA110	TA050	dog	96	28
CTA138	TA058	dog	655	168
CTA140	TA058	dog	652	168
CTA142	TA058	dog	659	168
CTA146	TA058	dog	650	168
CTA179	TA067	dog	683	175
CTA186	TA072	cat	234	60
CTA188	TA078	dog	234	60
CTA237	TA078	dog	655	168
CTA199	TA079	dog	283	68
CTA200	TA079	dog	650	168
CTA201	TA079	dog	655	168
CTA205	TA079	dog	657	168
CTA210	TA080	dog	136	43
CTA215	TA080	dog	135	43
CTA230	TA086	dog	700	182
CTA242	TA090	dog	234	60
CTA244	TA090	dog	522	137
CTA246	TA090	dog	655	168
CTA247	TA090	dog	656	168
CTA260	TA093	dog	655	168
CTA261	TA093	dog	522	137
CTA262	TA093	dog	654	168
CTA263	TA093	dog	663	168
CTA267	TA093	dog	653	168
CTA269	TA093	dog	650	168
CTA271	TA094	dog	519	137
CTA272	TA094	dog	517	137
CTA275	TA094	dog	510	136
CTA277	TA094	dog	518	137
CTA313	TA094	dog	513	137
CTA315	TA094	dog	515	137
CTA316	TA094	dog	516	137
CTA280	TA098	dog	498	135
CTA282	TA098	dog	507	136
CTA283	TA098	dog	724	185
CTA286	TA098	dog	509	136
CTA288	TA098	dog	492	134
CTA289	TA098	dog	490	134
CTA292	TA099	dog	553	143
CTA295	TA099	dog	552	143
CTA298	TA099	dog	551	143
CTA306	TA107	dog	222	60
CTA317	TA107	dog	342	88
CTA321	TA107	dog	351	88
CTA331	TA113	dog	437	107
CTA332	TA113	dog	439	107
CTA333	TA113	dog	440	107
CTA334	TA113	dog	438	107
CTA337	TA113	dog	442	107
CTA339	TA113	dog	441	107
CTA390	TA115	dog	234	60
CTA358	TA116	dog	234	60
CTA415	TA127	dog	654	168
CTA417	TA127	dog	691	176
CTA419	TA127	dog	690	176
CTA420	TA127	dog	685	176
CTA423	TA127	dog	692	176
CTA424	TA127	dog	684	176
CTA448	TA127	dog	687	176
CTA449	TA127	dog	686	176
CTA451	TA127	dog	689	176
CTA452	TA127	dog	688	176
CTA430	TA136	dog	571	150
CTA464	TA148	dog	706	182
CTA466	TA148	dog	499	135
CTA467	TA148	dog	705	182
CTA468	TA148	dog	703	182
CTA470	TA148	dog	727	187
CTA471	TA148	dog	704	182
CTA472	TA148	dog	725	185
CTA473	TA155	dog	443	108
CTA474	TA155	dog	535	137
CTA524	TA159	cat	565	147
CTA525	TA159	cat	505	136
CTA526	TA159	cat	503	136
CTA528	TA159	cat	567	148
CTA530	TA159	cat	504	136
CTA531	TA159	cat	566	147
CTA483	TA161	dog	63	23
CTA488	TA161	dog	60	23
CTA534	TA161	dog	61	23
CTA502	TA171	dog	655	168
CTA503	TA171	dog	661	168
CTA505	TA171	dog	662	168
CTA508	TA171	dog	660	168
CTA543	TA171	dog	658	168
CTA516	TA173	dog	655	168
CTA560	TA177	dog	188	53
CTA592	TA213	dog	189	53
CTA595	TA214	dog	681	174
CTA596	TA214	dog	682	174
CTA597	TA214	dog	476	126
CTA598	TA214	dog	555	143
CTA600	TA214	dog	679	174
CTA601	TA214	dog	677	174
CTA602	TA214	dog	680	174
CTA603	TA214	dog	556	143
CTA619	TA214	dog	678	174
CTA620	TA227	dog	655	168
CTA621	TA227	dog	651	168
CTA628	TA227	dog	471	125
CTA629	TA227	dog	472	125
CTA666	TA229	dog	469	123
CTA643	TA233	dog	465	123
CTA644	TA233	dog	470	124
CTA670	TA242	dog	464	123
CTA675	TA242	dog	463	123
CTA677	TA242	dog	468	123
CTA680	TA242	dog	467	123
CTA681	TA242	dog	466	123
CTA693	TA243	dog	336	88
CTA702	TA255	dog	473	126
CTA703	TA255	dog	474	126
CTA704	TA255	dog	475	126
CTA710	TA257	dog	401	95
CTA712	TA257	dog	409	95
CTA728	TA265	dog	214	60
CTA748	TA265	dog	234	60
CTA735	TA267	dog	62	23
CTA736	TA269	dog	393	95
CTA737	TA270	dog	393	95
CTA738	TA270	dog	390	95
CTA799	TA279	dog	234	60
CTA778	TA280	dog	655	168
CTA780	TA282	dog	550	143
CTA786	TA282	dog	554	143
CTA788	TA282	dog	655	168
CTA789	TA284	dog	156	49
CTA792	TA284	dog	96	28
CTA801	TA286	cat	707	182
CTA802	TA286	cat	711	182
CTA806	TA286	cat	103	29
CTA807	TA286	cat	712	182
CTA821	TA291	dog	234	60
CTA848	TA308	dog	331	88
CTA855	TA308	dog	655	168
